# Supplementary material
Source: Springer Nature journal article supplement (https://www.springermedizin.de/resource/supplementary/13034_2013_242_MOESM6_ESM.pdf/9652614)

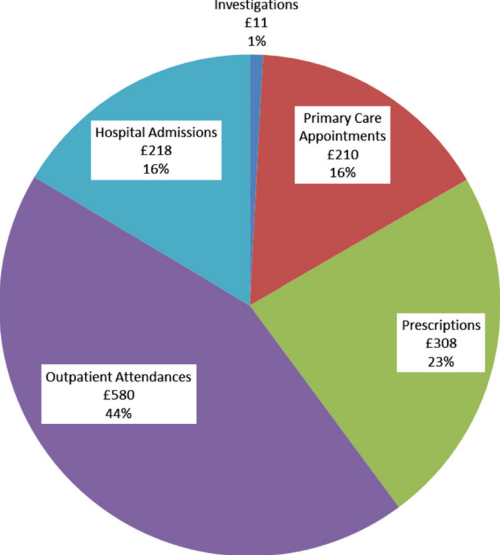

**Cases (£1,290)**

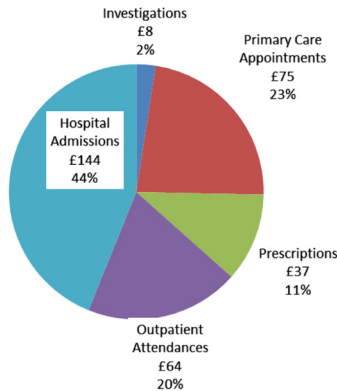

**Controls (£315)**

Supplement: MOESM6 [file 9652614]
